# Supplementary material for: The Influencing Factors of Aggregation Behavior of Tree-of-Heaven Trunk Weevil, Eucryptorrhynchus brandti (Harold) (Coleoptera: Curculionidae)
Source: MDPI journal article supplement (doi:10.3390/insects14030253), 2023-03-03
Supplement: s1 [file s1]

## Supplementary Materials:

### Formulas S1–S3

$$Rr = \frac{a+b}{c} \times 100\% \quad (S1)$$

$$SRr = \frac{a}{a+b} \times 100\% \quad (S2)$$

$$SC = \frac{a-b}{a+b} \times 100\% \quad (S3)$$

Formulas S1–S3. Calculated Rr, SRr, SC, including that a: number of adults in the odor source tube; b: number of adults in the air tube; c: total number of test adults.
